# Supplementary material for: Propane dehydrogenation catalysis of group IIIB and IVB metal hydrides
Source: Royal Society of Chemistry journal article supplement (doi:10.1039/d4ra02473g), 2024-01-01
Supplement: d4ra02473g1.pdf [file d4ra02473g1.pdf]

## Electronic supplementary information

### Propane dehydrogenation catalysis of group IIIB and IVB metal hydrides

Xiaoming Hu,<sup>a</sup> Mengwen Huang,<sup>a</sup> Tetsuya Kinjyo<sup>b</sup>, Shinya Mine,<sup>c</sup> Takashi Toyao,<sup>a</sup> Yoyo Hinuma,<sup>d</sup> Masaaki Kitano,<sup>e,f</sup> Toyoto Sato,<sup>g</sup> Norikazu Namiki,<sup>b</sup> Ken-ichi Shimizu<sup>\*a</sup> and Zen Maeno<sup>\*b</sup>

a. Institute for Catalysis, Hokkaido University, N-21, W-10, Sapporo 001-0021, Japan.

b. School of Advanced Engineering, Kogakuin University, 2665-1, Nakano-cho, Hachioji, 192-0015, Japan

c. National Institute of Advanced Industrial Science and Technology (AIST), Research Institute for Chemical Process Technology, 4-2-1 Nigatake, Miyagino, Sendai 983-8551, Japan

d. Department of Energy and Environment, National Institute of Advanced Industrial Science and Technology, 1-8-31, Midorigaoka, Ikeda 563-8577, Japan.

e. MDX Research Center for Element Strategy, International Research Frontiers Initiative, Tokyo Institute of Technology, Midori, Yokohama 226-8503, Japan

f. Advanced Institute for Materials Research (WPI-AIMR), Tohoku University, Sendai 980-8577, Japan

g. Department of Engineering Science and Mechanics, College of Engineering, Shibaura Institute of Technology, Tokyo 135-8548, Japan

## Preparation of PtSn and CrO<sub>x</sub> catalysts

SiO<sub>2</sub>-supported PtSn bimetallic catalyst was prepared by the pore-filling co-impregnation method using SiO<sub>2</sub> as the support (PtSn/SiO<sub>2</sub>, Pt: 1 wt%, Pt:Sn = 1:1). Mixed aqueous solution of Pt(NH<sub>3</sub>)<sub>2</sub>(NO<sub>2</sub>)<sub>2</sub> and SnCl<sub>2</sub> was added dropwise to ground dried SiO<sub>2</sub> (CARiACT G-6, Fuji Silysia) so that the solutions just filled the pores of the SiO<sub>2</sub>. The mixture was kept in a sealed round-bottom flask overnight at room temperature, followed by quick freezing with liquid nitrogen, freeze-drying in vacuum at -5 °C. The resulting powder was further dried in an oven at 90 °C overnight, calcined in dry air at 400 °C for 1 h, and finally reduced by H<sub>2</sub> (50 mL/min) at 700 °C for 1 h.<sup>S1</sup>

Al<sub>2</sub>O<sub>3</sub>-supported PtSn-K catalyst was prepared according to the previous report.<sup>S2</sup> Al<sub>2</sub>O<sub>3</sub> (SASOL, PURALOX SBa 200) was added into the mixed aqueous solution containing Pt(NH<sub>3</sub>)<sub>2</sub>(NO<sub>2</sub>)<sub>2</sub>, SnCl<sub>2</sub>, and KNO<sub>3</sub>. The water was removed by evaporation from the above mixture. The obtained solid was dried in an oven at 90 °C overnight, calcined in dry air at 750 °C for 2 h, and finally reduced by H<sub>2</sub> (50 mL/min) at 700 °C for 1 h.<sup>2</sup>

Al<sub>2</sub>O<sub>3</sub> supported Cr-oxide catalysts (CrO<sub>x</sub>/Al<sub>2</sub>O<sub>3</sub>, (Cr: 20 wt%)) was prepared according to the previous papers.<sup>S3</sup> Al<sub>2</sub>O<sub>3</sub> (purity: >99.99%, powder 2-3 μm, Kojundo Chemical Co.,Ltd.), was used as support material, and Cr(NO<sub>3</sub>)<sub>3</sub>·9H<sub>2</sub>O (purity: >99.99%, powder, SIGMA-ALDRICH Co.,Ltd.) was used as a chromium source. Cr(NO<sub>3</sub>)<sub>3</sub>·9H<sub>2</sub>O aqueous solution and Al<sub>2</sub>O<sub>3</sub> were mixed by a magnetic stirrer at room temperature for 3 h. The mixture was evaporated at 50 °C to remove water. The resulting solid was dried in the oven at 100 °C for 1 h and then calcined for 6 h at 600 °C. After grinding in a mortar, the powder can be used in the experiment.

## Characterization

XRD measurements were conducted using a Rigaku MiniFlex II/AP diffractometer with Cu Kα radiation (Rigaku Corporation, Japan). The samples were transferred to the chamber without exposure to air. The detail analysis was performed using indexing program TREOR97<sup>4</sup> and least-squares refinement of lattice constant program PIRUM<sup>5</sup>. N<sub>2</sub> adsorption measurements were conducted by using an AUTOSOBB 6AG (Yuasa Ionics Co.). The samples used in this measurement were 0.2 g. For H<sub>2</sub> TPD and isotope experiments, the generated gases a mass spectrometer (BELMass, MicrotracBEL Corp.) was utilized to monitor m/z = 2 (H<sub>2</sub>), 3 (HD), 4 (D<sub>2</sub>), 42 (C<sub>3</sub>H<sub>6</sub>), 43 (C<sub>3</sub>H<sub>7</sub><sup>+</sup>), 44 (C<sub>3</sub>H<sub>8</sub>), and 45 (C<sub>3</sub>H<sub>9</sub><sup>+</sup>).

## Figures

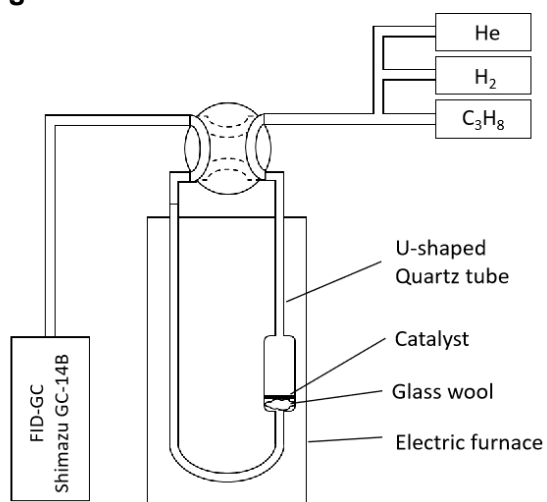

**Fig. S1** Illustration of reactor systems for PDH reaction. Metal hydrides were loaded into a U-shaped quartz reactor connecting with 4-way valve in glove box, and then transfer to the reactor without exposure to air.

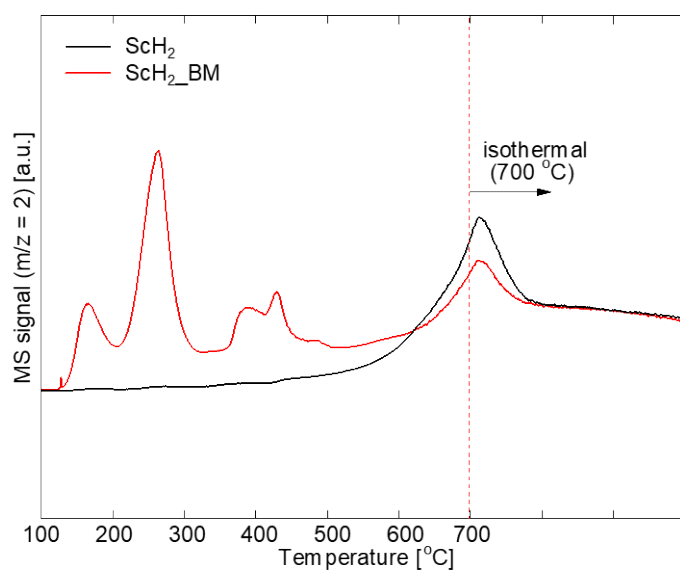

**Fig. S2** H<sub>2</sub> TPD profile of the ScH<sub>2</sub> and ScH<sub>2</sub>\_BM under He flow (m/z = 2).

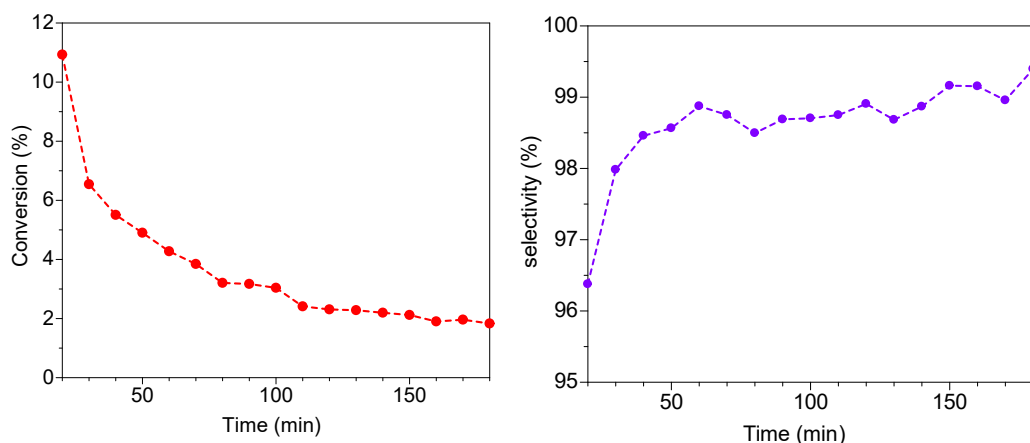

**Fig. S3** Conversion and propylene selectivity of PDH reaction using  $\text{LaH}_3\text{-BM}$  at 450 °C.

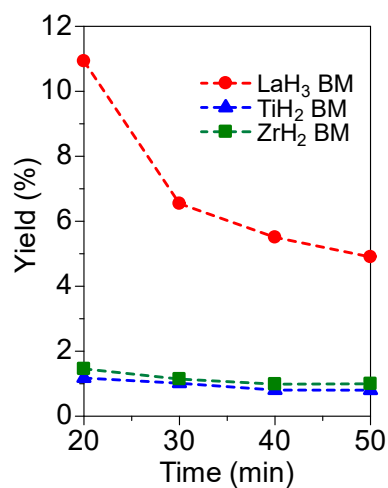

**Fig. S4** Comparison of conversion values of PDH reaction using different ball-illed metal hydrides at 450 °C.

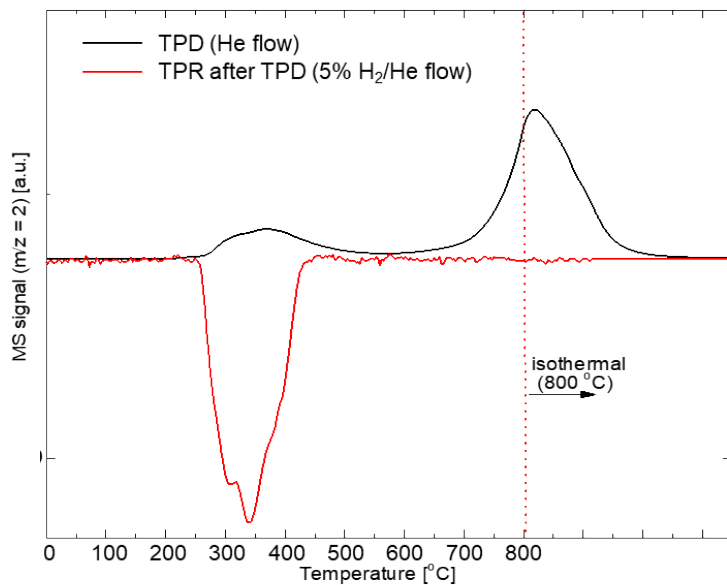

**Fig. S5** H<sub>2</sub> TPD profile of LaH<sub>3</sub> under He flow and successive H<sub>2</sub> TPR profile under H<sub>2</sub>/He flow (m/z = 2).

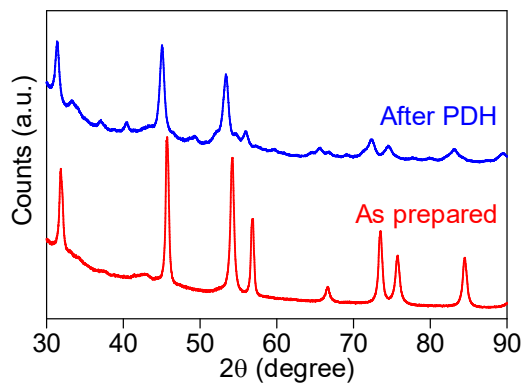

**Fig. S6** XRD pattern of as-prepared LaH<sub>3</sub> and the LaH<sub>3</sub> after PDH reaction for 3 h. The sample was transfer to the XRD chamber without exposure to air.

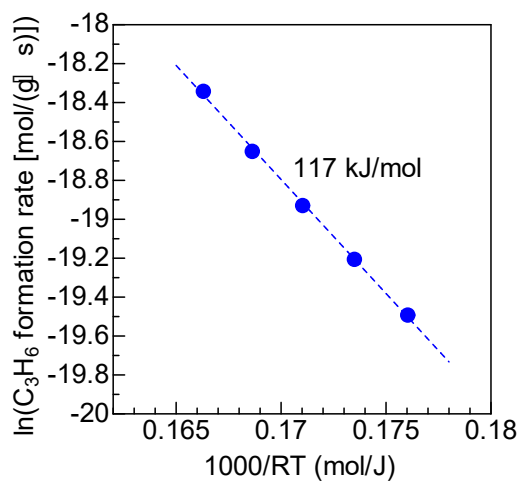

**Fig. S7** Temperature dependence of propylene formation rate in PDH using K-PtSn/Al<sub>2</sub>O<sub>3</sub>.

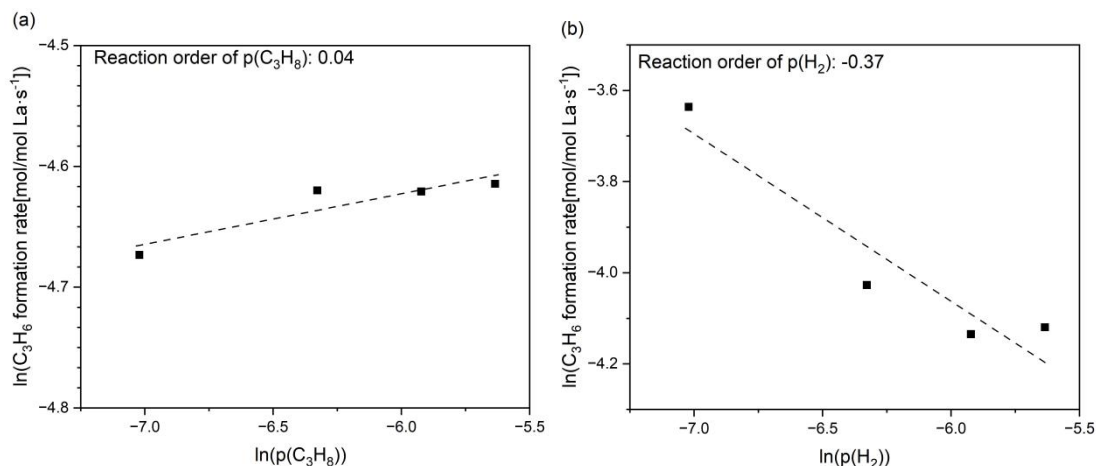

**Fig. S8** Effects of the partial pressures of C<sub>3</sub>H<sub>8</sub> and H<sub>2</sub> ( $p(\text{C}_3\text{H}_8)$  and  $p(\text{H}_2)$ ) on PDH using ZrH<sub>2</sub>. (a) Effect of  $p(\text{C}_3\text{H}_8)$  (C<sub>3</sub>H<sub>8</sub> concentration: 2% – 8%, H<sub>2</sub> concentration: zero (without H<sub>2</sub> co-feeding)). (b) Effect of  $p(\text{H}_2)$  (C<sub>3</sub>H<sub>8</sub> concentration: 10% (fixed), H<sub>2</sub> concentration: 2%–8%). 100 mg of as-prepared ZrH<sub>2</sub> was utilized, and the total flow rate was fixed at 50 mL/min.

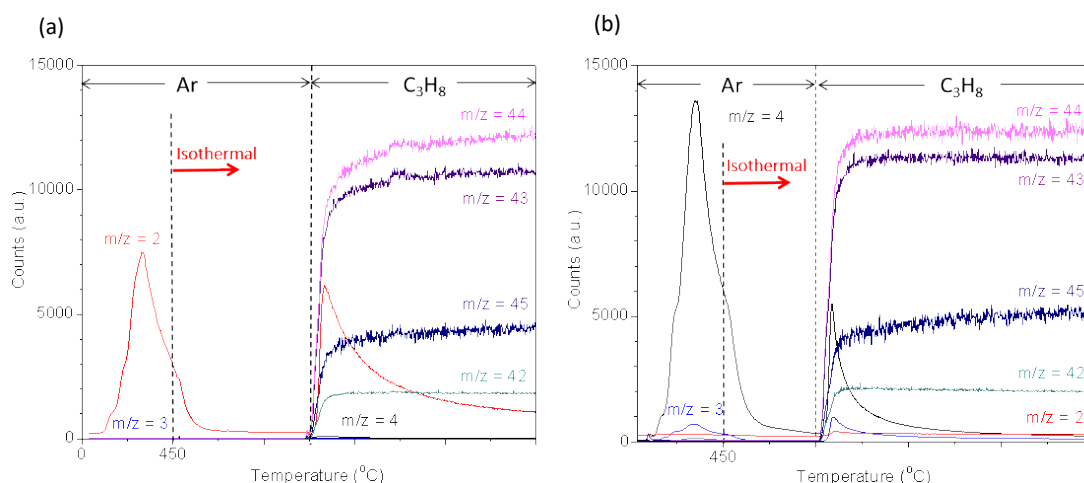

**Fig. S9** The gas products in PDH using (a) LaH<sub>3</sub> and (b) LaD<sub>3</sub> including Ar pre-treatment. The temperature was isothermal after being increased from 30 to 450 °C. After the signals for H<sub>2</sub> or D<sub>2</sub> were stabilized, propane was introduced at a concentration of 10%. The total flow rate was 10 mL/min, and the carrier gas was Ar. The mass numbers of the gases shown are  $m/z = 2$  (H<sub>2</sub>), 3 (HD), 4 (D<sub>2</sub>), 42 (C<sub>3</sub>H<sub>6</sub>), 43 (C<sub>3</sub>H<sub>7</sub><sup>+</sup>), 44 (C<sub>3</sub>H<sub>8</sub>), and 45 (C<sub>3</sub>H<sub>9</sub><sup>+</sup>).

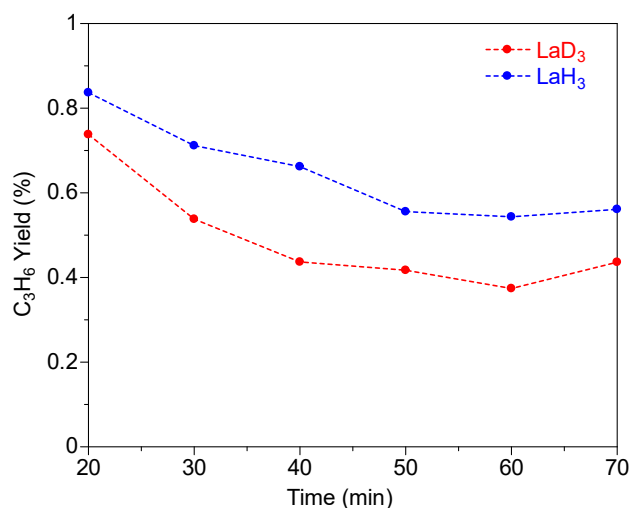

**Fig. S10** C<sub>3</sub>H<sub>6</sub> yield in PDH reaction (10 mL/min of 10% C<sub>3</sub>H<sub>8</sub>/Ar) of 450 °C using 100 mg of LaH<sub>3</sub> or LaD<sub>3</sub>.

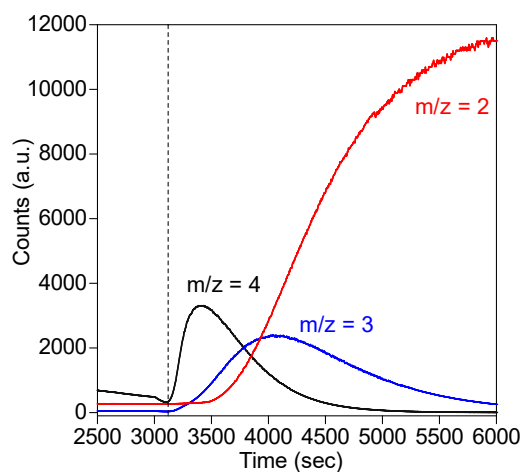

**Fig. S11** The gas products in the reaction of LaD<sub>3</sub> with H<sub>2</sub>. The temperature was isothermal after being increased from 30 to 450 °C. After the signals for D<sub>2</sub> were stabilized, H<sub>2</sub> was introduced at a concentration of 10%. The total flow rate was 10 mL/min, and the carrier gas was Ar. The mass numbers of the gases shown are m/z = 2 (H<sub>2</sub>), 3 (HD), and 4 (D<sub>2</sub>).



### Calculation of normalized formation rate

The normalized formation rate was calculated using the following equation.

$$\text{Normalized formation rate} \left[ \frac{\mu\text{mol}}{\text{h} \cdot \text{m}^2} \right] = \frac{\text{Propane molar flow rate} \left[ \frac{\mu\text{mol}}{\text{min}} \right] \times 60 \left[ \frac{\text{min}}{\text{h}} \right] \times \text{Propylene yield}}{\text{Catalyst amount} [\text{g}] \times \text{Specific surface area} [\text{m}^2/\text{g}]}$$

Table S1. Detail results of PDH reaction using LaH<sub>3</sub>\_BM.

| Time (min) | Conversion (%) | Yield (%) | Selectivity (%) |                               |                               |                               | Carbon balance |
|------------|----------------|-----------|-----------------|-------------------------------|-------------------------------|-------------------------------|----------------|
|            |                |           | CH <sub>4</sub> | C <sub>2</sub> H <sub>6</sub> | C <sub>2</sub> H <sub>4</sub> | C <sub>3</sub> H <sub>6</sub> |                |
| 0          | 15.4           | 0.7       | 94.7            | 0.3                           | 0.2                           | 4.8                           | 0.60           |
| 10         | 3.0            | 2.9       | 1.7             | 0.4                           | 0.9                           | 97.0                          | 0.98           |
| 20         | 2.7            | 2.6       | 1.0             | 0.0                           | 0.9                           | 98.1                          | 0.98           |
| 30         | 2.5            | 2.5       | 0.8             | 0.0                           | 0.8                           | 98.4                          | 0.98           |
| 40         | 2.4            | 2.4       | 0.7             | 0.0                           | 0.9                           | 98.4                          | 0.98           |
| 50         | 2.3            | 2.3       | 0.0             | 0.0                           | 0.0                           | 100                           | 0.98           |

Reaction conditions: 100 mg of LaH<sub>3</sub>\_BM(1h), 100 mL/min of 10% C<sub>3</sub>H<sub>8</sub>/Ar flow, 450 °C. The conversion, yield and selectivity values were determined by FID GC.

Table S2. Detail results of regeneration test in PDH reaction using LaH<sub>3</sub>\_BM. The used LaH<sub>3</sub>\_BM for PDH was treated with H<sub>2</sub> (100 mL/min of 10% H<sub>2</sub>/Ar) at 300 °C to investigate the regeneration.

| Time (min) | Conversion (%) | Yield (%) | Selectivity (%) |                               |                               |                               | c.balance |
|------------|----------------|-----------|-----------------|-------------------------------|-------------------------------|-------------------------------|-----------|
|            |                |           | CH <sub>4</sub> | C <sub>2</sub> H <sub>6</sub> | C <sub>2</sub> H <sub>4</sub> | C <sub>3</sub> H <sub>6</sub> |           |
| 0          | 0.2            | 0.2       | 0.9             | 0.0                           | 0.0                           | 99.1                          | 1.0       |
| 10         | 0.5            | 0.5       | 0.0             | 0.0                           | 0.0                           | 100                           | 1.0       |
| 30         | <0.1           | <0.1      | 0.0             | 0.0                           | 0.0                           | 100                           | 1.0       |
| 40         | 0.6            | 0.6       | 0.0             | 0.0                           | 0.0                           | 100                           | 1.0       |
| 50         | 0.7            | 0.7       | 0.0             | 0.0                           | 0.0                           | 100                           | 1.0       |

Reaction conditions: 100 mg of the H<sub>2</sub> treated LaH<sub>3</sub>\_BM(1h) after PDH, 100 mL/min of 10% C<sub>3</sub>H<sub>8</sub>/Ar flow, 450 °C. The conversion, yield and selectivity values were determined by FID GC.

## References

- S1 Y. Nakaya, J. Hirayama, S. Yamazoe, K. Shimizu and S. Furukawa, *Nat. Commun.*, 2020, **11**, 2838.
- S2 J. Im and M. Choi, *ACS Catal.*, 2016, **6**, 2819.
- S3 A. D. Erdali, S. Cetinyokus and M. Dogan, *Chem. Eng. Process.*, 2022, **175**, 108904.
- S4 P. E. Werner, L. Eriksson and M. Westdahl, *J. Appl. Crystallogr.*, 1985, **18**, 367-370.
- S5 P. E. Werner, *Ark. Kemi.*, 1969, **31**, 513.
